# Supplementary material for: Ferromagnetic 2p-2p and 4f-2p Couplings in a Macrocycle from Two Biradicals and Two Gadolinium(III) Ions
Source: MDPI journal article supplement (doi:10.3390/molecules27154930), 2022-08-02
Supplement: s1 [file s1]

## Supporting Information for

# Ferromagnetic 2p-2p and 4f-2p Couplings in a Macrocycle from Two Biradicals and Two Gadolinium(III) Ions

Saki Ito, Toru Yoshitake, and Takayuki Ishida\*

*Department of Engineering Science, The University of Electro-Communications,  
Chofu, Tokyo 182-8585, Japan*

*\*e-mail address: takayuki.ishida@uec.ac.jp*

| Contents                                                                                                                                               | Page       |
|--------------------------------------------------------------------------------------------------------------------------------------------------------|------------|
| <b>Figure S1.</b> $^1\text{H}$ NMR spectrum of the precursory bishydroxylamine                                                                         | p. S2      |
| <b>Figure S2.</b> $^{13}\text{C}$ NMR spectrum of the precursory bishydroxylamine                                                                      | p. S3      |
| <b>Figure S3.</b> FT-IR spectra of <b>iPr<sub>3</sub>BPBN</b> and [ $\{\text{Gd}(\text{hfac})_3(\mu\text{-iPr}_3\text{BPBN})\}_2$ ]                    | p. S4      |
| <b>Table S1.</b> Selected geometric data of <b>1</b> •( $\text{CH}_2\text{Cl}_2$ ) <sub>2</sub> .                                                      | p. S5      |
| <b>Figures S4 and S5.</b><br>Simulation on $\chi_m T$ - $T$ and $M$ - $H$ for [ $\{\text{Gd}(\text{hfac})_3(\mu\text{-iPr}_3\text{BPBN})\}_2$ ]        | p. S6      |
| <b>Figure S6 and Table S2.</b><br>DFT calculation results on <b>iPr<sub>3</sub>BPBN</b>                                                                | pp. S7-8   |
| <b>Figure S7 and Table S3.</b><br>DFT calculation results on [ $\{\text{Y}(\text{hfac})_3(\text{H}_2\text{O})\}_2(\mu\text{-iPr}_3\text{BPBN})$ ]      | pp. S9-12  |
| <b>Figure S8 and Table S4.</b><br>DFT calculation results on [ $\text{Gd}(\text{hfac})_3(\text{H}_2\text{O})(\text{iPr}_3\text{BPBNH})$ ] ( <b>2</b> ) | pp. S13-15 |
| <b>Figure S9.</b> Calculated spin densities of the nonet and septet states of <b>2</b> .                                                               | p. S16     |
| <b>References</b>                                                                                                                                      | p. S17     |

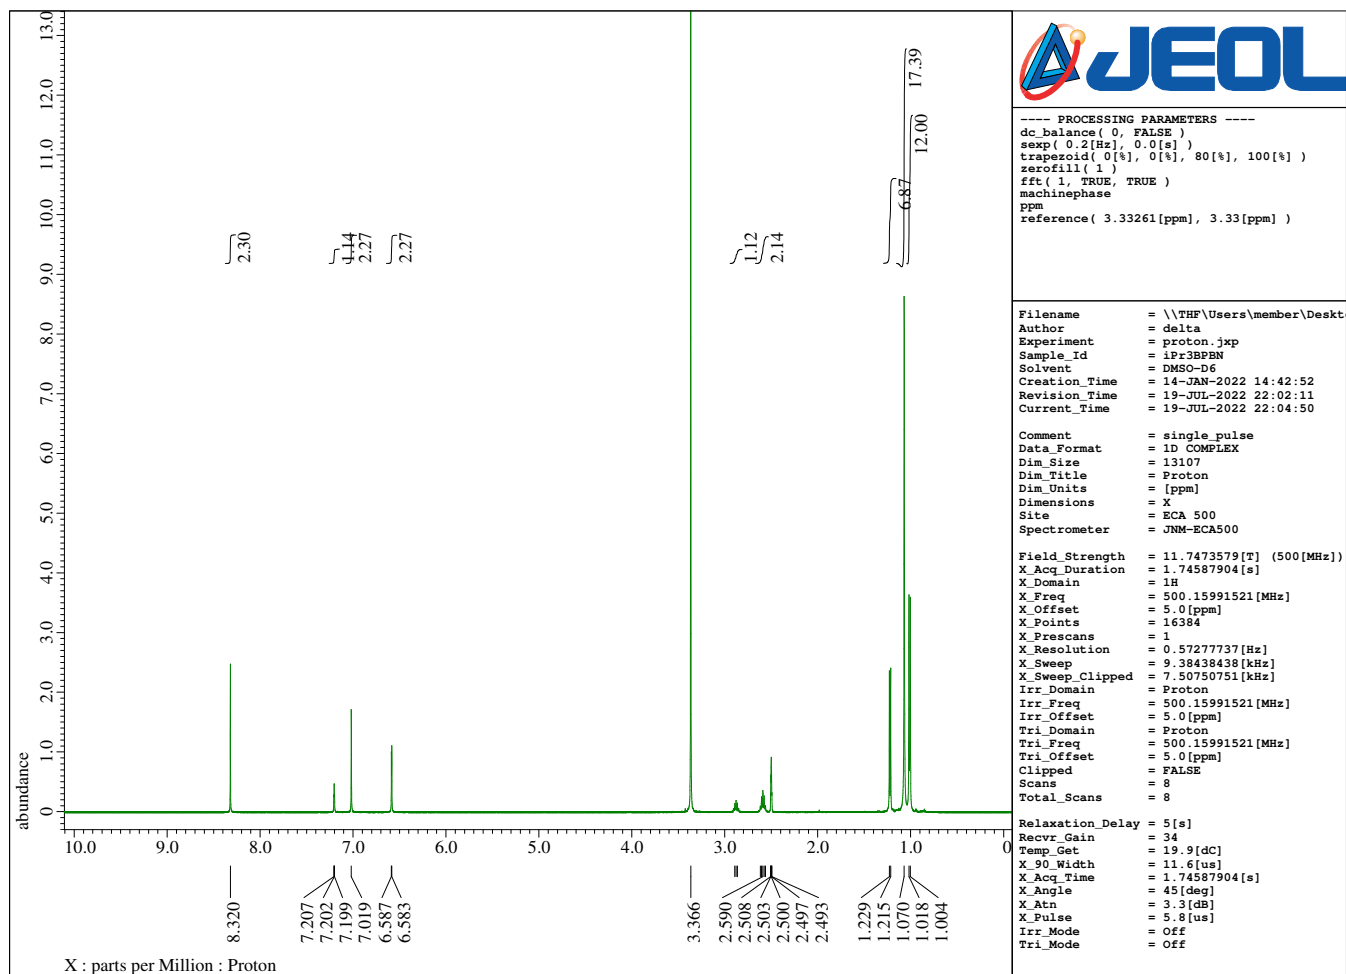

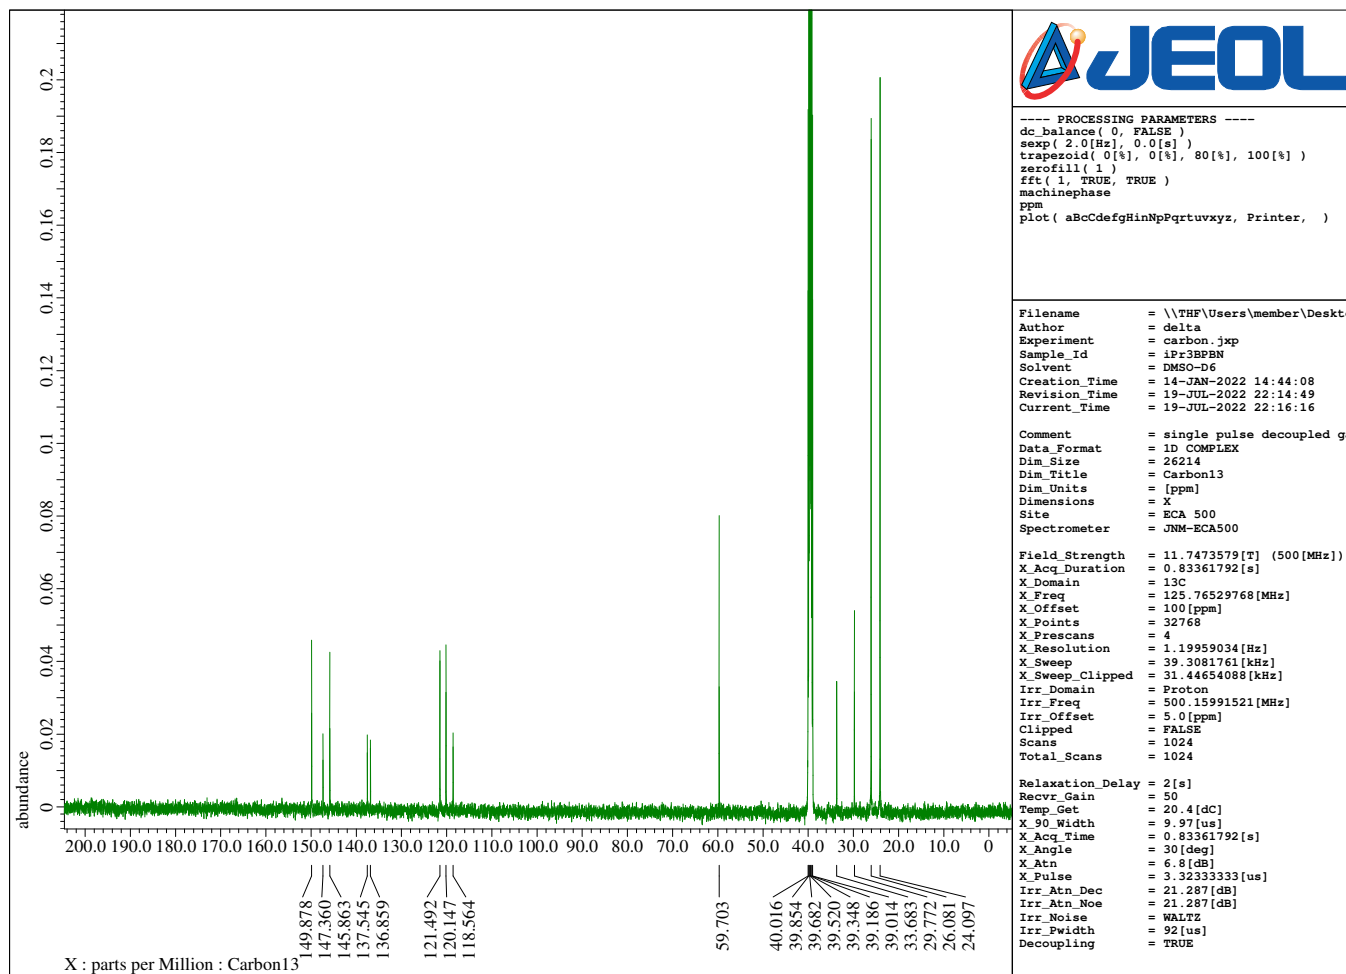

**Figure S2.**  $^{13}\text{C}$  NMR spectrum of the bishydroxylamine as a precursor of **iPr<sub>3</sub>BPBN**, measured in dimethyl sulfoxide- $d_6$  at room temperature. Chemical shifts are shown with respect to the solvent methyl signal at 39.52 ppm.

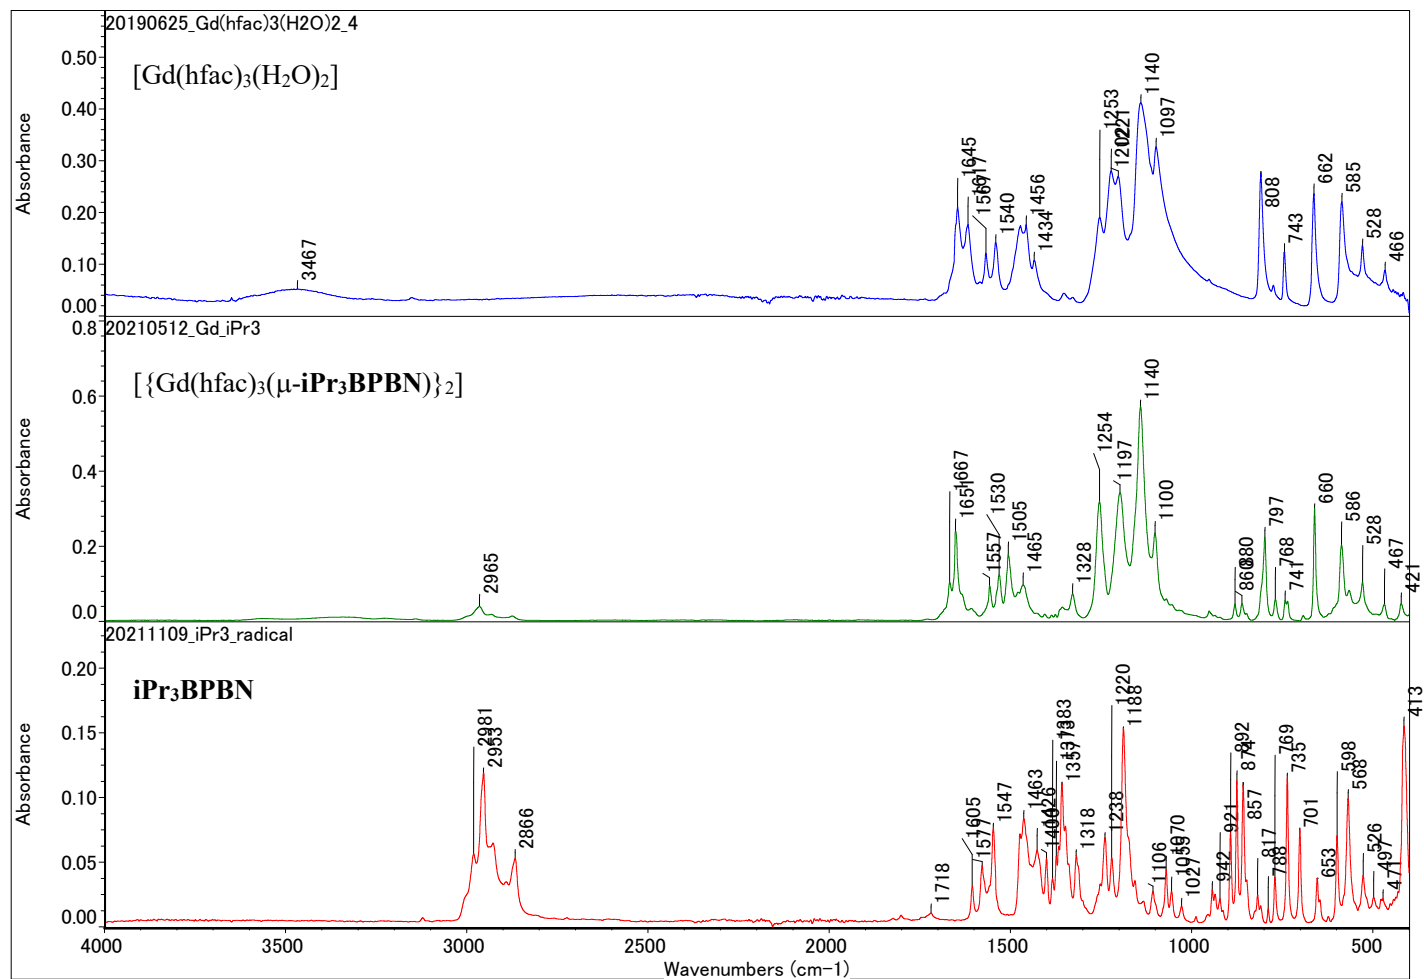

**Figure S3.** FT-IR spectra of neat samples for (top) [Gd(hfac)<sub>3</sub>(H<sub>2</sub>O)<sub>2</sub>], (middle) [ {Gd(hfac)<sub>3</sub>(μ-iPr<sub>3</sub>BPBN) }<sub>2</sub> ] (1), and (bottom) iPr<sub>3</sub>BPBN.

**Table S1.** Selected geometrical data of **1**•(CH<sub>2</sub>Cl<sub>2</sub>)<sub>2</sub>.<sup>a)</sup>

| Compound              | <b>1</b> •(CH <sub>2</sub> Cl <sub>2</sub> ) <sub>2</sub> | Compound           | <b>1</b> •(CH <sub>2</sub> Cl <sub>2</sub> ) <sub>2</sub> |
|-----------------------|-----------------------------------------------------------|--------------------|-----------------------------------------------------------|
| distance <i>d</i> / Å |                                                           | angle <i>θ</i> / ° |                                                           |
| Gd1-O1                | 2.344(8)                                                  | O1*-Gd1-O1         | 84.0(4)                                                   |
| Gd1-O1*               | 2.344(8)                                                  | O1*-Gd1-O2A        | 145.6(5)                                                  |
| Gd1-O2A               | 2.541(19)                                                 | O1*-Gd1-O2A*       | 96.0(6)                                                   |
| Gd1-O2A*              | 2.541(19)                                                 | O1-Gd1-O2A*        | 145.6(5)                                                  |
| Gd1-O3A               | 2.657(18)                                                 | O1-Gd1-O2A         | 96.0(6)                                                   |
| Gd1-O3A*              | 2.657(18)                                                 | O1-Gd1-O3A         | 70.3(5)                                                   |
| Gd1-O3B               | 2.141(15)                                                 | O1*-Gd1-O3A*       | 70.3(5)                                                   |
| Gd1-O3B*              | 2.141(15)                                                 | O1-Gd1-O3A*        | 83.0(4)                                                   |
| Gd1-O4A               | 2.371(17)                                                 | O1*-Gd1-O3A        | 83.0(4)                                                   |
| Gd1-O4A*              | 2.371(17)                                                 | O1-Gd1-O4A*        | 72.5(5)                                                   |
| Gd1-O4B               | 2.425(16)                                                 | O1*-Gd1-O4A        | 72.5(5)                                                   |
| Gd1-O4B*              | 2.425(16)                                                 | O1*-Gd1-O4A*       | 144.5(5)                                                  |
| Gd1-O2B               | 2.166(16)                                                 | O1-Gd1-O4A         | 144.5(5)                                                  |
| Gd1-O2B*              | 2.166(16)                                                 | O1*-Gd1-O4B*       | 80.4(5)                                                   |
| O1-N1                 | 1.296(10)                                                 | O1-Gd1-O4B         | 80.4(5)                                                   |
| N1-C1                 | 1.406(11)                                                 | O1*-Gd1-O4B        | 133.9(5)                                                  |
| N1-C5                 | 1.501(16)                                                 | O1-Gd1-O4B*        | 133.9(5)                                                  |
|                       |                                                           | O3B-Gd1-O1*        | 81.1(5)                                                   |
|                       |                                                           | O3B*-Gd1-O1*       | 75.1(5)                                                   |
|                       |                                                           | O3B-Gd1-O1         | 75.1(5)                                                   |
|                       |                                                           | O3B*-Gd1-O1        | 81.1(5)                                                   |
|                       |                                                           | O3B-Gd1-O4A        | 75.2(6)                                                   |
|                       |                                                           | O3B*-Gd1-O4A*      | 75.2(6)                                                   |
|                       |                                                           | O2B*-Gd1-O1        | 153.1(5)                                                  |
|                       |                                                           | O2B-Gd1-O1         | 109.7(5)                                                  |
|                       |                                                           | O2B-Gd1-O1*        | 153.1(5)                                                  |
|                       |                                                           | O2B*-Gd1-O1*       | 109.7(5)                                                  |
|                       |                                                           | O2B-Gd1-O4B        | 72.4(6)                                                   |
|                       |                                                           | O2B*-Gd1-O4B*      | 72.4(6)                                                   |
|                       |                                                           | O1-Gd1             | 144.9(7)                                                  |
|                       |                                                           | N1-C1              | 115.3(8)                                                  |
|                       |                                                           | N1-C5              | 116.2(9)                                                  |

a) The symmetry operation code of \* is  $3/4 - y, 3/4 - x, 3/4 - z$ .

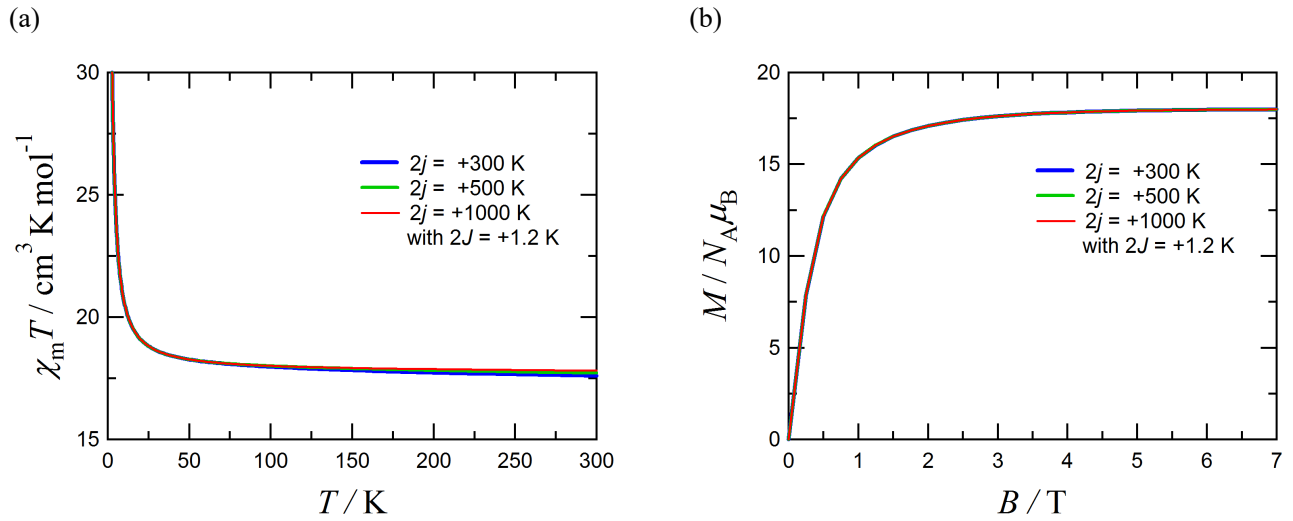

**Figure S4.** Simulated curves of the  $\chi_m T$  vs  $T$  (a) and  $M$  vs  $H$  (b) plots for  $[\{\text{Gd}(\text{hfac})_3(\mu\text{-iPr}_3\text{BPBN})\}_2]$  (**1**). The adjustable parameter  $j$  is unique with the 4f-2p heterospin interaction parameter  $2J$  frozen to be +1.2 K. The spin Hamiltonian utilized here was :

$$\hat{H} = -2J(\hat{S}_{\text{Gd1}} \cdot \hat{S}_{\text{rad1}} + \hat{S}_{\text{Gd1}} \cdot \hat{S}_{\text{rad3}} + \hat{S}_{\text{Gd2}} \cdot \hat{S}_{\text{rad2}} + \hat{S}_{\text{Gd2}} \cdot \hat{S}_{\text{rad4}}) - 2j(\hat{S}_{\text{rad1}} \cdot \hat{S}_{\text{rad2}} + \hat{S}_{\text{rad3}} \cdot \hat{S}_{\text{rad4}}).$$

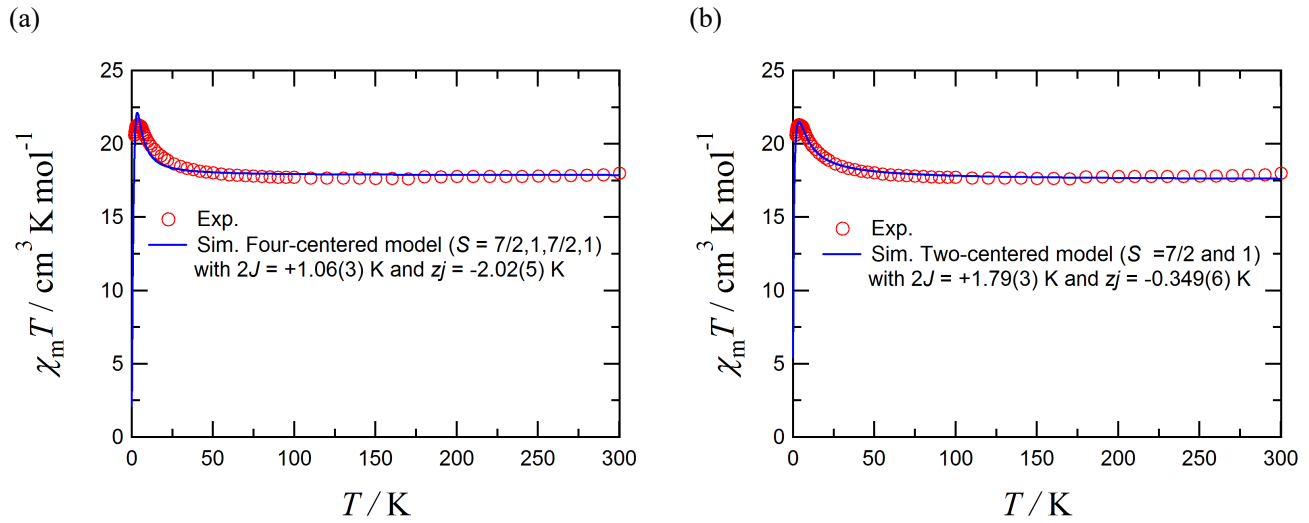

**Figure S5.**  $\text{iPr}_3\text{BPBN}$  is approximately treated as a  $S = 1$  species, and a mean-field parameter ( $zj$ ) was applied to the analysis. In (a), four spin centers ( $S = 7/2, 1, 7/2$ , and  $1$ ) are circularly arranged, and the nearest neighbors are coupled with a unique  $J$ . Intermolecular interactions correspond to  $zj$ . In (b), two spin centers ( $S = 7/2$  and  $1$ ) are coupled with  $J$ . Intermolecular interactions as well as interaction between the counterparts are confined to  $zj$ .

**Figure S6 and Table S2.** Atomic numbering scheme and Mulliken atomic spin densities for the triplet and singlet states of **iPr<sub>3</sub>BPBN**. DFT calculation was performed at the ub3lyp/6-311+g(d) level [S1].

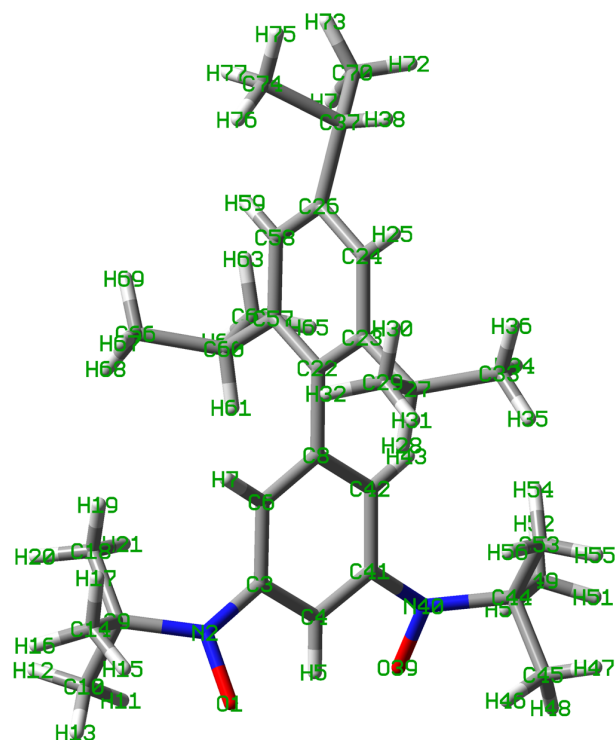

| label | symbol | spin density |           |
|-------|--------|--------------|-----------|
|       |        | triplet      | singlet   |
| 1     | O      | 0.506882     | 0.514553  |
| 2     | N      | 0.412135     | 0.405809  |
| 3     | C      | -0.142911    | -0.045716 |
| 4     | C      | 0.169098     | 0.000759  |
| 5     | H      | -0.007976    | -0.000007 |
| 6     | C      | 0.188855     | 0.011196  |
| 7     | H      | -0.011711    | -0.000453 |
| 8     | C      | -0.025824    | 0.000372  |
| 9     | C      | -0.075718    | -0.081737 |
| 10    | C      | 0.025951     | 0.030074  |
| 11    | H      | -0.000433    | -0.000387 |
| 12    | H      | -0.001249    | -0.001139 |
| 13    | H      | 0.000188     | 0.000167  |
| 14    | C      | 0.009142     | 0.007639  |
| 15    | H      | -0.000230    | -0.000300 |
| 16    | H      | 0.000769     | 0.000712  |
| 17    | H      | -0.000823    | -0.000891 |
| 18    | C      | 0.022794     | 0.022207  |
| 19    | H      | -0.000003    | -0.000411 |
| 20    | H      | -0.000113    | -0.000540 |
| 21    | H      | -0.000619    | -0.000475 |
| 22    | C      | -0.000462    | 0.000463  |
| 23    | C      | -0.007418    | 0.002688  |
| 24    | C      | 0.000756     | 0.000462  |
| 25    | H      | -0.000131    | -0.000001 |
| 26    | C      | -0.002226    | -0.000223 |

|    |   |           |           |
|----|---|-----------|-----------|
| 27 | C | 0.009114  | -0.001743 |
| 28 | H | -0.000381 | -0.000203 |
| 29 | C | -0.000602 | 0.000066  |
| 30 | H | -0.000010 | -0.000005 |
| 31 | H | -0.000051 | -0.000006 |
| 32 | H | -0.000114 | -0.000111 |
| 33 | C | -0.001037 | 0.000026  |
| 34 | H | -0.000025 | 0.000028  |
| 35 | H | -0.000029 | 0.000016  |
| 36 | H | 0.000018  | 0.000014  |
| 37 | C | -0.000149 | -0.000313 |
| 38 | H | -0.000003 | 0.000000  |
| 39 | O | 0.506960  | -0.514716 |
| 40 | N | 0.411874  | -0.405344 |
| 41 | C | -0.140753 | 0.042866  |
| 42 | C | 0.188129  | -0.010322 |
| 43 | H | -0.011726 | 0.000466  |
| 44 | C | -0.076040 | 0.081988  |
| 45 | C | 0.026121  | -0.030213 |
| 46 | H | -0.000432 | 0.000389  |
| 47 | H | -0.001236 | 0.001126  |
| 48 | H | 0.000191  | -0.000170 |
| 49 | C | 0.008904  | -0.007258 |
| 50 | H | -0.000224 | 0.000293  |
| 51 | H | 0.000772  | -0.000715 |
| 52 | H | -0.000812 | 0.000881  |
| 53 | C | 0.022948  | -0.022455 |
| 54 | H | 0.000005  | 0.000444  |
| 55 | H | -0.000110 | 0.000540  |
| 56 | H | -0.000598 | 0.000487  |
| 57 | C | -0.007267 | -0.002507 |
| 58 | C | 0.001371  | -0.000636 |
| 59 | H | -0.000131 | 0.000004  |
| 60 | C | 0.008718  | 0.001945  |
| 61 | H | -0.000397 | 0.000211  |
| 62 | C | -0.000450 | -0.000023 |
| 63 | H | -0.000009 | 0.000004  |
| 64 | H | -0.000052 | 0.000009  |
| 65 | H | -0.000131 | 0.000096  |
| 66 | C | -0.001029 | 0.000135  |
| 67 | H | -0.000039 | -0.000054 |
| 68 | H | -0.000028 | -0.000022 |
| 69 | H | 0.000017  | -0.000013 |
| 70 | C | 0.000016  | -0.000034 |
| 71 | H | -0.000003 | -0.000004 |
| 72 | H | -0.000003 | 0.000001  |
| 73 | H | -0.000002 | 0.000000  |
| 74 | C | -0.000005 | 0.000019  |
| 75 | H | -0.000003 | 0.000000  |
| 76 | H | 0.000002  | -0.000005 |
| 77 | H | 0.000003  | -0.000003 |

---



**Figure S7 and Table S3.** Atomic numbering scheme and Mulliken atomic spin densities for the triplet and singlet states of [ $\{Y(hfac)_3(H_2O)\}_2(\mu\text{-iPr}_3\text{BPBN})$ ]. DFT calculation was performed at the ub3lyp level with 6-311+g(d) for C, H, N, O, F and lanl2dz for Y [S1].

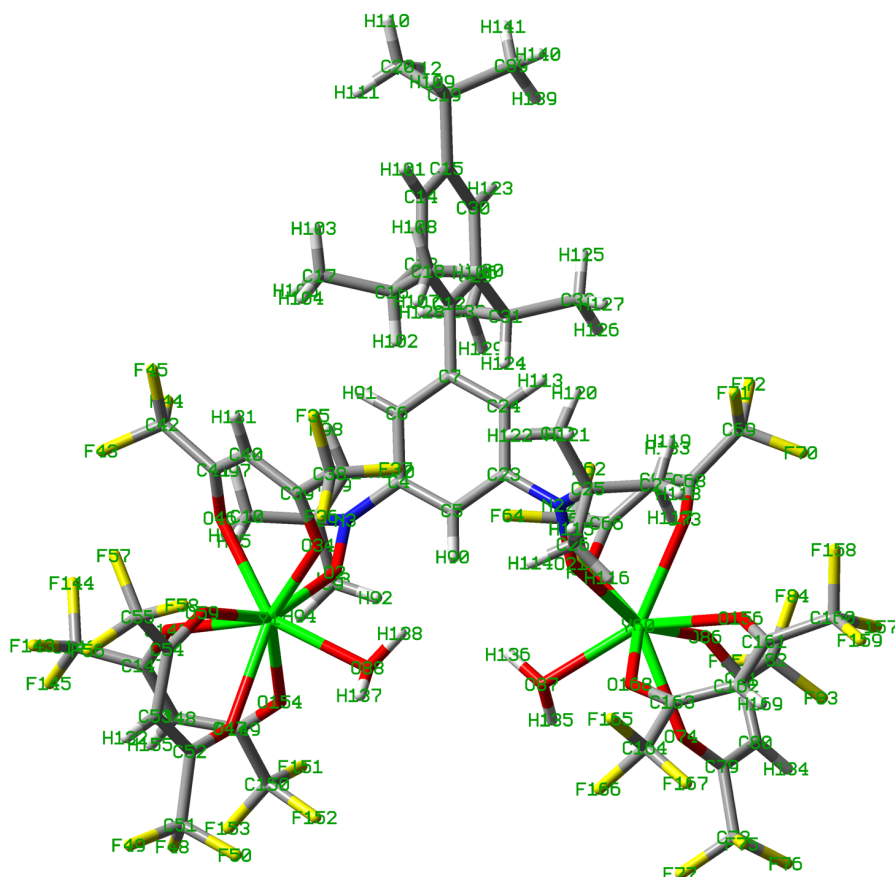

| label | symbol | spin density |           |
|-------|--------|--------------|-----------|
|       |        | triplet      | singlet   |
| 1     | Y      | 0.030519     | -0.028582 |
| 2     | O      | 0.347883     | -0.361528 |
| 3     | N      | 0.518861     | -0.518982 |
| 4     | C      | -0.105633    | 0.046268  |
| 5     | C      | 0.154733     | 0.000289  |
| 6     | C      | 0.193187     | -0.002245 |
| 7     | C      | -0.078195    | -0.000088 |
| 8     | C      | -0.036739    | 0.030891  |
| 9     | C      | 0.031305     | -0.031132 |
| 10    | C      | -0.026527    | 0.026164  |
| 11    | C      | 0.022925     | -0.017604 |
| 12    | C      | 0.003557     | 0.000136  |
| 13    | C      | -0.002460    | 0.003318  |
| 14    | C      | 0.001079     | -0.000569 |
| 15    | C      | -0.002442    | 0.000307  |
| 16    | C      | 0.005032     | -0.002297 |
| 17    | C      | -0.000821    | -0.000231 |
| 18    | C      | -0.000675    | 0.000724  |
| 19    | C      | -0.000449    | 0.000284  |

|    |   |           |           |
|----|---|-----------|-----------|
| 20 | C | -0.000036 | -0.000006 |
| 21 | O | 0.347979  | 0.361545  |
| 22 | N | 0.518241  | 0.518411  |
| 23 | C | -0.104695 | -0.046294 |
| 24 | C | 0.192858  | 0.002043  |
| 25 | C | -0.037391 | -0.031749 |
| 26 | C | 0.031489  | 0.031234  |
| 27 | C | -0.025649 | -0.025273 |
| 28 | C | 0.023090  | 0.017827  |
| 29 | C | -0.002128 | -0.003363 |
| 30 | C | 0.001752  | 0.000773  |
| 31 | C | 0.002018  | 0.001568  |
| 32 | C | -0.000683 | -0.000072 |
| 33 | C | -0.000653 | -0.000717 |
| 34 | O | 0.001100  | -0.000747 |
| 35 | F | 0.000002  | -0.000003 |
| 36 | F | 0.000023  | -0.000018 |
| 37 | F | -0.000016 | -0.000039 |
| 38 | C | -0.002108 | 0.002516  |
| 39 | C | -0.004896 | 0.003290  |
| 40 | C | 0.006507  | -0.005258 |
| 41 | C | 0.000049  | 0.002816  |
| 42 | C | -0.000419 | -0.002666 |
| 43 | F | -0.000087 | 0.000068  |
| 44 | F | 0.000438  | -0.000403 |
| 45 | F | -0.000051 | 0.000038  |
| 46 | O | 0.002969  | -0.004088 |
| 47 | O | -0.000051 | 0.000079  |
| 48 | F | 0.000011  | -0.000012 |
| 49 | F | 0.000034  | -0.000035 |
| 50 | F | -0.000004 | 0.000004  |
| 51 | C | -0.000122 | 0.000114  |
| 52 | C | -0.001105 | 0.001140  |
| 53 | C | -0.000092 | 0.000048  |
| 54 | C | 0.001270  | -0.001229 |
| 55 | C | 0.000570  | -0.000521 |
| 56 | F | 0.000002  | -0.000002 |
| 57 | F | 0.000012  | -0.000014 |
| 58 | F | -0.000003 | 0.000003  |
| 59 | O | 0.000434  | -0.000437 |
| 60 | Y | 0.030961  | 0.028930  |
| 61 | O | 0.001312  | 0.000847  |
| 62 | F | 0.000004  | 0.000003  |
| 63 | F | 0.000016  | 0.000011  |
| 64 | F | -0.000037 | 0.000041  |
| 65 | C | -0.003758 | -0.003768 |
| 66 | C | -0.004692 | -0.005731 |
| 67 | C | 0.005777  | 0.003776  |
| 68 | C | 0.001846  | -0.001557 |
| 69 | C | -0.000812 | 0.006587  |
| 70 | F | -0.000082 | -0.000062 |
| 71 | F | 0.000447  | 0.000422  |
| 72 | F | -0.000054 | -0.000037 |
| 73 | O | 0.002793  | 0.003750  |
| 74 | O | -0.000033 | -0.000060 |
| 75 | F | 0.000011  | 0.000012  |
| 76 | F | 0.000033  | 0.000034  |
| 77 | F | -0.000003 | -0.000004 |

|     |   |           |           |
|-----|---|-----------|-----------|
| 78  | C | -0.000082 | -0.000083 |
| 79  | C | -0.001234 | -0.001261 |
| 80  | C | 0.000369  | 0.000389  |
| 81  | C | 0.000946  | 0.000987  |
| 82  | C | 0.000537  | 0.000464  |
| 83  | F | 0.000002  | 0.000002  |
| 84  | F | 0.000010  | 0.000009  |
| 85  | F | -0.000005 | -0.000005 |
| 86  | O | 0.000457  | 0.000449  |
| 87  | O | 0.003323  | 0.003700  |
| 88  | O | 0.003373  | -0.003893 |
| 89  | C | 0.000050  | 0.000053  |
| 90  | H | -0.012817 | 0.000058  |
| 91  | H | -0.012876 | -0.000210 |
| 92  | H | -0.001416 | 0.001165  |
| 93  | H | -0.001037 | 0.000960  |
| 94  | H | -0.000459 | 0.000503  |
| 95  | H | -0.001874 | 0.001927  |
| 96  | H | 0.001286  | -0.001250 |
| 97  | H | -0.000265 | 0.000267  |
| 98  | H | 0.000634  | -0.000262 |
| 99  | H | -0.000434 | 0.000861  |
| 100 | H | -0.000796 | 0.001335  |
| 101 | H | -0.000157 | 0.000017  |
| 102 | H | 0.000062  | 0.000431  |
| 103 | H | -0.000032 | 0.000001  |
| 104 | H | -0.000053 | 0.000053  |
| 105 | H | -0.000012 | 0.000135  |
| 106 | H | -0.000007 | 0.000019  |
| 107 | H | -0.000038 | 0.000009  |
| 108 | H | 0.000022  | -0.000013 |
| 109 | H | -0.000002 | 0.000000  |
| 110 | H | -0.000003 | 0.000002  |
| 111 | H | 0.000000  | 0.000014  |
| 112 | H | 0.000002  | 0.000003  |
| 113 | H | -0.012878 | 0.000219  |
| 114 | H | -0.001407 | -0.001152 |
| 115 | H | -0.001033 | -0.000955 |
| 116 | H | -0.000484 | -0.000527 |
| 117 | H | -0.001877 | -0.001934 |
| 118 | H | 0.001316  | 0.001268  |
| 119 | H | -0.000302 | -0.000304 |
| 120 | H | 0.000647  | 0.000219  |
| 121 | H | -0.000432 | -0.000868 |
| 122 | H | -0.000745 | -0.001446 |
| 123 | H | -0.000156 | -0.000021 |
| 124 | H | 0.000101  | -0.000370 |
| 125 | H | -0.000030 | 0.000001  |
| 126 | H | -0.000047 | -0.000046 |
| 127 | H | -0.000018 | -0.000117 |
| 128 | H | -0.000017 | 0.000014  |
| 129 | H | -0.000036 | -0.000015 |
| 130 | H | 0.000022  | 0.000012  |
| 131 | H | -0.000091 | 0.000037  |
| 132 | H | -0.000003 | 0.000003  |
| 133 | H | -0.000090 | -0.000040 |
| 134 | H | -0.000001 | -0.000001 |
| 135 | H | 0.000026  | 0.000014  |

|     |   |           |           |
|-----|---|-----------|-----------|
| 136 | H | 0.000014  | -0.000302 |
| 137 | H | 0.000034  | -0.000025 |
| 138 | H | 0.000046  | 0.000327  |
| 139 | H | 0.000003  | 0.000008  |
| 140 | H | -0.000005 | -0.000003 |
| 141 | H | -0.000001 | 0.000001  |
| 142 | O | -0.000508 | 0.000429  |
| 143 | F | 0.000009  | -0.000009 |
| 144 | F | -0.000008 | 0.000004  |
| 145 | F | -0.000003 | 0.000003  |
| 146 | C | 0.000418  | -0.000315 |
| 147 | C | 0.001710  | -0.001658 |
| 148 | C | -0.000621 | 0.000737  |
| 149 | C | -0.000430 | 0.000258  |
| 150 | C | 0.000190  | -0.000351 |
| 151 | F | 0.000074  | -0.000077 |
| 152 | F | -0.000026 | 0.000025  |
| 153 | F | 0.000014  | -0.000015 |
| 154 | O | -0.000721 | 0.000523  |
| 155 | H | 0.000006  | -0.000007 |
| 156 | O | -0.000519 | -0.000422 |
| 157 | F | 0.000008  | 0.000008  |
| 158 | F | -0.000004 | -0.000001 |
| 159 | F | -0.000003 | -0.000004 |
| 160 | C | 0.000259  | 0.000195  |
| 161 | C | 0.001705  | 0.001731  |
| 162 | C | -0.000286 | -0.000570 |
| 163 | C | -0.000636 | -0.000361 |
| 164 | C | 0.000585  | 0.000722  |
| 165 | F | 0.000059  | 0.000061  |
| 166 | F | -0.000025 | -0.000024 |
| 167 | F | 0.000013  | 0.000014  |
| 168 | O | -0.000827 | -0.000626 |
| 169 | H | 0.000006  | 0.000007  |

---

**Figure S8 and Table S4.** Atomic numbering scheme and Mulliken atomic spin densities for the nonet and septet states of  $[\text{Gd}(\text{hfac})_3(\text{H}_2\text{O})(\text{iPr}_3\text{BPBNH})]$  (**2**). DFT calculation was performed at the ub3lyp level with 6-311+g(d) for C, H, N, O, F and sdd for Gd [S1].

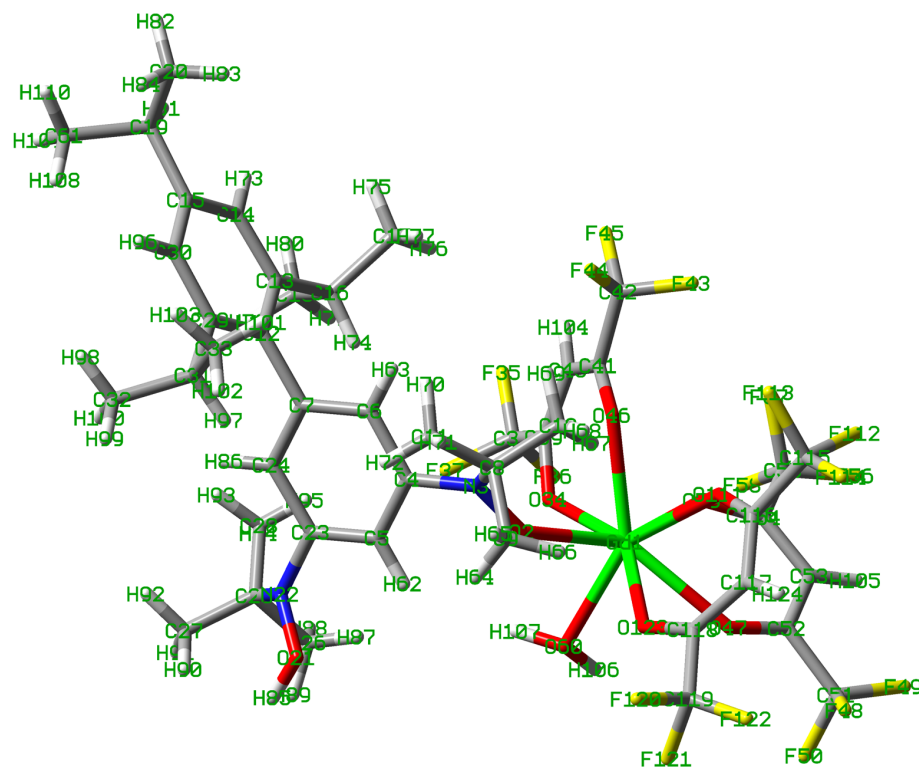

| label | symbol | spin density |           |
|-------|--------|--------------|-----------|
|       |        | nonet        | septet    |
| 1     | Gd     | 7.059999     | 7.024140  |
| 2     | O      | 0.325027     | -0.330321 |
| 3     | N      | 0.580836     | -0.580015 |
| 4     | C      | -0.102973    | 0.102022  |
| 5     | C      | 0.095142     | -0.095270 |
| 6     | C      | 0.107015     | -0.106863 |
| 7     | C      | -0.044211    | 0.043922  |
| 8     | C      | -0.072596    | 0.073241  |
| 9     | C      | 0.034530     | -0.034476 |
| 10    | C      | 0.019978     | -0.018891 |
| 11    | C      | -0.000113    | -0.000001 |
| 12    | C      | 0.001689     | -0.001715 |
| 13    | C      | -0.000743    | 0.000691  |
| 14    | C      | 0.000953     | -0.000927 |
| 15    | C      | -0.001450    | 0.001459  |
| 16    | C      | 0.001738     | -0.001778 |
| 17    | C      | 0.000606     | -0.000536 |
| 18    | C      | -0.000361    | 0.000344  |
| 19    | C      | -0.000306    | 0.000305  |
| 20    | C      | -0.000023    | 0.000025  |
| 21    | O      | -0.002458    | 0.002456  |
| 22    | N      | -0.006164    | 0.006056  |

|    |   |           |           |
|----|---|-----------|-----------|
| 23 | C | -0.044762 | 0.044615  |
| 24 | C | 0.108710  | -0.108479 |
| 25 | C | 0.000975  | -0.001030 |
| 26 | C | -0.001284 | 0.001283  |
| 27 | C | -0.001009 | 0.001025  |
| 28 | C | 0.002505  | -0.002465 |
| 29 | C | -0.001245 | 0.001227  |
| 30 | C | 0.000796  | -0.000778 |
| 31 | C | 0.003063  | -0.003054 |
| 32 | C | -0.000289 | 0.000277  |
| 33 | C | -0.000410 | 0.000414  |
| 34 | O | -0.005245 | -0.005998 |
| 35 | F | -0.000072 | -0.000070 |
| 36 | F | -0.000016 | 0.000033  |
| 37 | F | -0.000057 | 0.000186  |
| 38 | C | -0.004457 | 0.004034  |
| 39 | C | 0.003858  | -0.010719 |
| 40 | C | 0.000805  | 0.001949  |
| 41 | C | -0.012183 | 0.017577  |
| 42 | C | 0.003631  | -0.004380 |
| 43 | F | -0.000059 | 0.000072  |
| 44 | F | 0.000620  | -0.000582 |
| 45 | F | -0.000111 | -0.000021 |
| 46 | O | -0.011883 | -0.002916 |
| 47 | O | -0.004559 | -0.004383 |
| 48 | F | 0.000035  | 0.000035  |
| 49 | F | -0.000012 | -0.000069 |
| 50 | F | 0.000038  | 0.000049  |
| 51 | C | 0.000253  | -0.000319 |
| 52 | C | 0.002815  | 0.002606  |
| 53 | C | -0.000793 | -0.001520 |
| 54 | C | -0.000540 | -0.000370 |
| 55 | C | -0.001217 | -0.000776 |
| 56 | F | -0.000090 | -0.000098 |
| 57 | F | 0.000065  | 0.000065  |
| 58 | F | 0.000048  | 0.000039  |
| 59 | O | -0.009398 | -0.012714 |
| 60 | O | -0.000747 | -0.002668 |
| 61 | C | 0.000001  | -0.000001 |
| 62 | H | -0.004981 | 0.004945  |
| 63 | H | -0.005842 | 0.005839  |
| 64 | H | -0.000258 | 0.000276  |
| 65 | H | 0.000431  | -0.000407 |
| 66 | H | -0.000180 | 0.000224  |
| 67 | H | 0.001357  | -0.001413 |
| 68 | H | 0.001142  | -0.001148 |
| 69 | H | -0.000388 | 0.000405  |
| 70 | H | 0.000444  | -0.000446 |
| 71 | H | -0.000467 | 0.000469  |
| 72 | H | -0.000860 | 0.000857  |
| 73 | H | -0.000093 | 0.000093  |
| 74 | H | -0.000167 | 0.000183  |
| 75 | H | -0.000006 | 0.000007  |
| 76 | H | -0.000055 | 0.000053  |
| 77 | H | -0.000095 | 0.000098  |
| 78 | H | -0.000033 | 0.000033  |
| 79 | H | -0.000018 | 0.000019  |
| 80 | H | 0.000014  | -0.000014 |

|     |   |           |           |
|-----|---|-----------|-----------|
| 81  | H | 0.000000  | 0.000000  |
| 82  | H | -0.000002 | 0.000002  |
| 83  | H | -0.000002 | 0.000002  |
| 84  | H | 0.000000  | 0.000000  |
| 85  | H | -0.000280 | 0.000281  |
| 86  | H | -0.007097 | 0.007086  |
| 87  | H | -0.000100 | 0.000097  |
| 88  | H | -0.000163 | 0.000164  |
| 89  | H | 0.000011  | -0.000011 |
| 90  | H | 0.000021  | -0.000021 |
| 91  | H | 0.000070  | -0.000069 |
| 92  | H | 0.000032  | -0.000032 |
| 93  | H | 0.000192  | -0.000192 |
| 94  | H | 0.000299  | -0.000299 |
| 95  | H | 0.000387  | -0.000378 |
| 96  | H | -0.000076 | 0.000075  |
| 97  | H | 0.000227  | -0.000224 |
| 98  | H | -0.000013 | 0.000013  |
| 99  | H | -0.000018 | 0.000018  |
| 100 | H | -0.000059 | 0.000058  |
| 101 | H | 0.000033  | -0.000033 |
| 102 | H | -0.000004 | 0.000004  |
| 103 | H | 0.000013  | -0.000013 |
| 104 | H | -0.000067 | 0.000007  |
| 105 | H | 0.000057  | 0.000072  |
| 106 | H | -0.000445 | -0.000445 |
| 107 | H | 0.000071  | -0.000109 |
| 108 | H | -0.000003 | 0.000003  |
| 109 | H | -0.000001 | 0.000001  |
| 110 | H | -0.000001 | 0.000001  |
| 111 | O | -0.005086 | -0.005644 |
| 112 | F | 0.000000  | -0.000003 |
| 113 | F | 0.000070  | -0.000018 |
| 114 | F | -0.000067 | -0.000063 |
| 115 | C | -0.000369 | -0.000416 |
| 116 | C | 0.003499  | 0.000905  |
| 117 | C | 0.000473  | -0.000153 |
| 118 | C | -0.003611 | -0.001753 |
| 119 | C | 0.001810  | -0.003023 |
| 120 | F | 0.000056  | -0.000014 |
| 121 | F | -0.000042 | 0.000037  |
| 122 | F | -0.000056 | -0.000053 |
| 123 | O | -0.003612 | -0.001875 |
| 124 | H | 0.000015  | -0.000004 |

---

**Figure S9.** Calculated spin densities of the nonet and septet states of **2**.

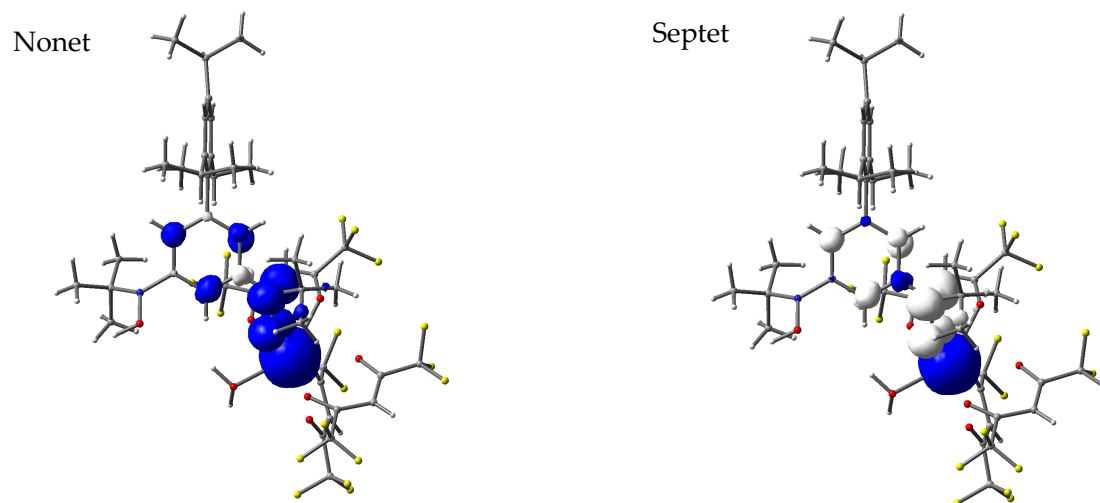

Note: The SCF energies were  $-5056.91058803$  au with  $\langle S^2 \rangle = 20.0001$  and  $-5056.91062710$  au with  $\langle S^2 \rangle = 12.0125$  for the nonet and septet states, respectively.



## References

- (S1) *Gaussian 16, Revision C.01*, Frisch, M. J.; Trucks, G. W.; Schlegel, H. B.; Scuseria, G. E.; Robb, M. A.; Cheeseman, J. R.; Scalmani, G.; Barone, V.; Petersson, G. A.; Nakatsuji, H. *et al.* Gaussian, Inc., Wallingford CT, 2016.
